# Supplementary material
Source: MDPI journal article supplement (https://www.mdpi.com/2073-4395/12/9/1986)
Supplement: s1 [file s1]

Boscalid

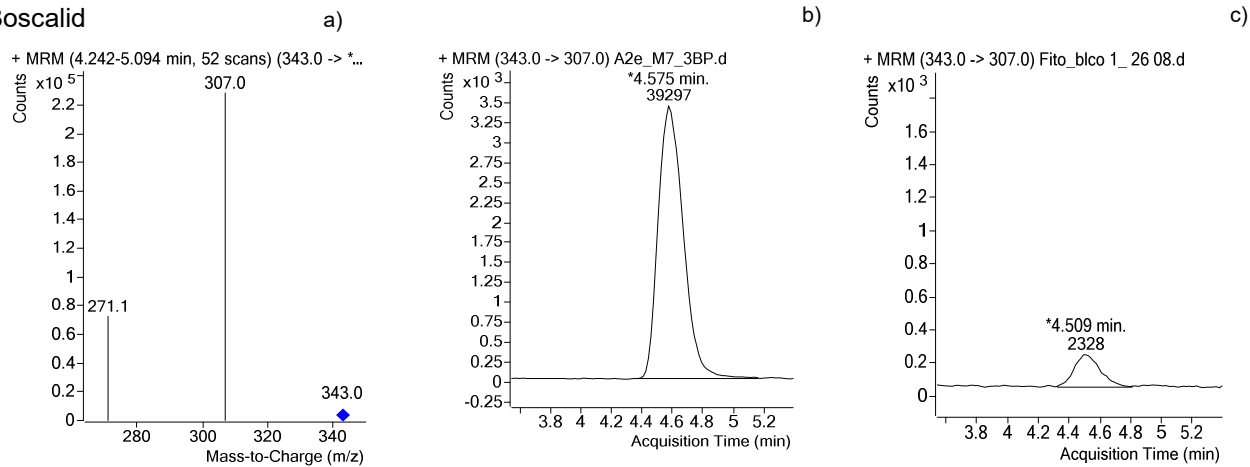

Pyraclostrobin

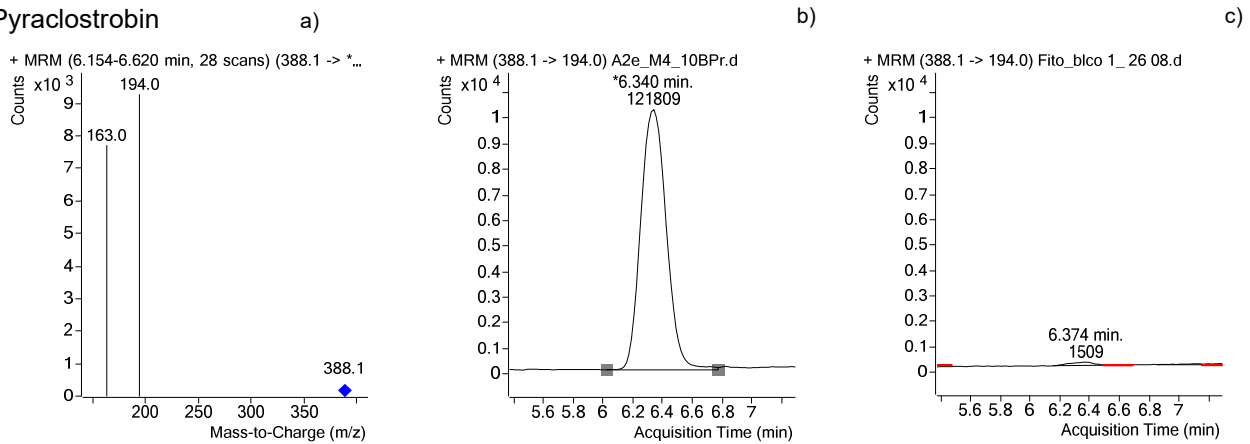

Acetamiprid

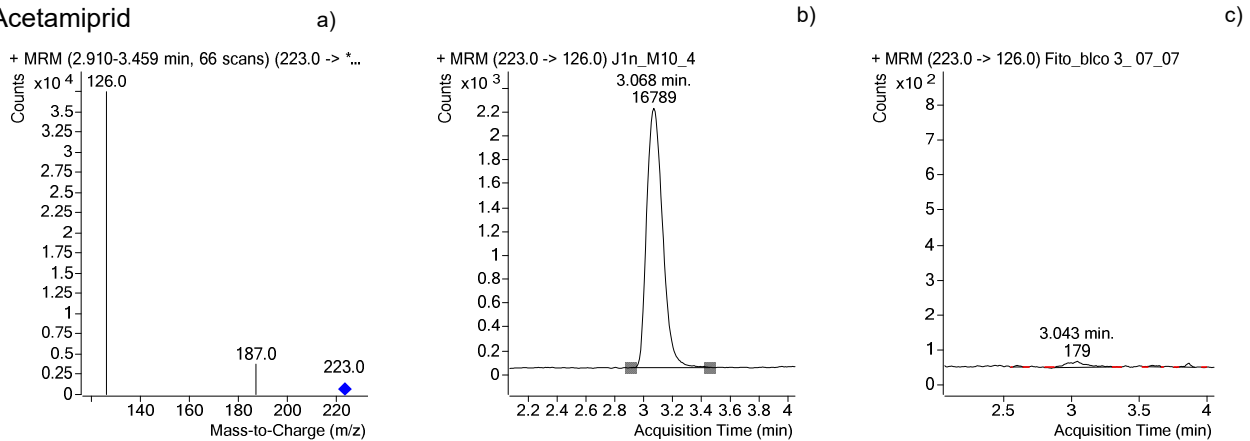

Tebuconazol

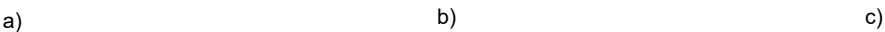

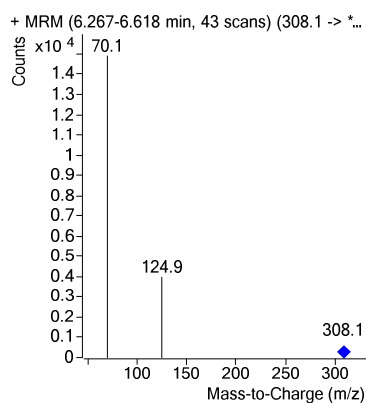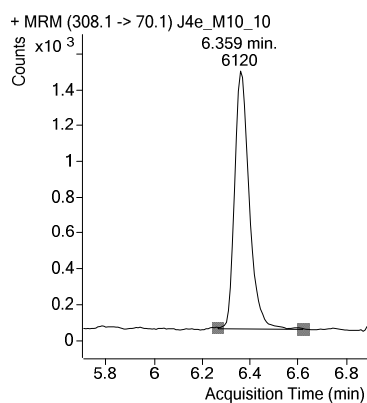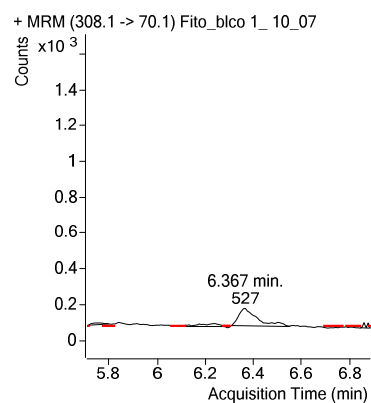

## Fluopyram

a)

b)

c)

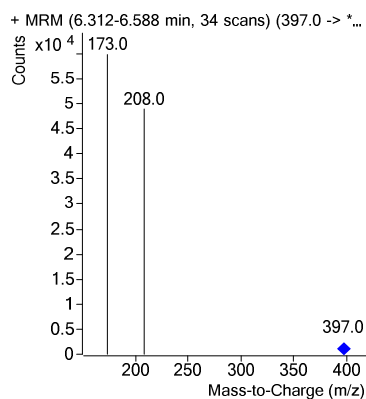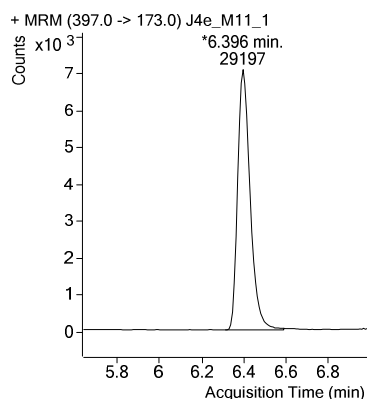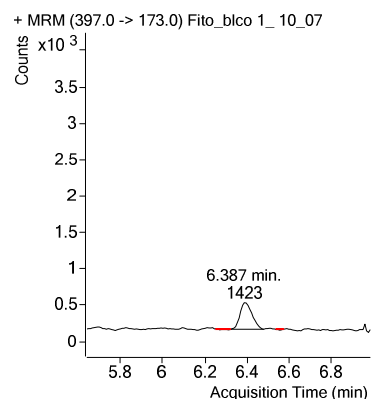

## Fenpyrazamine

a)

b)

c)

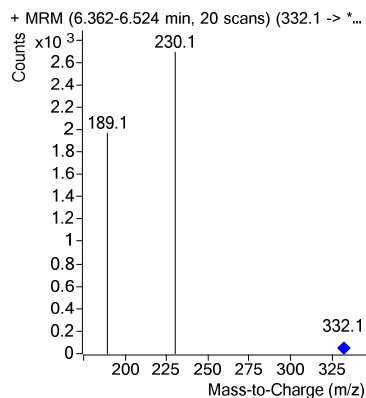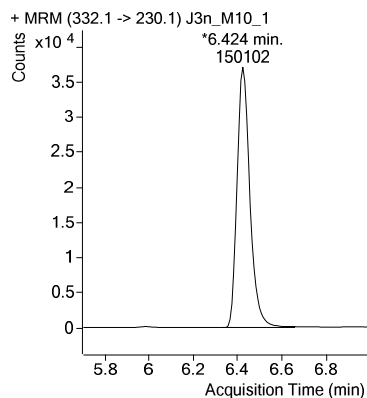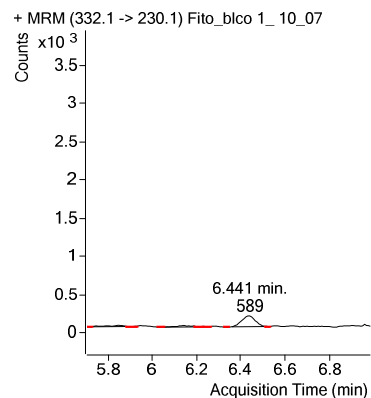

## Fenbuconazole

a)

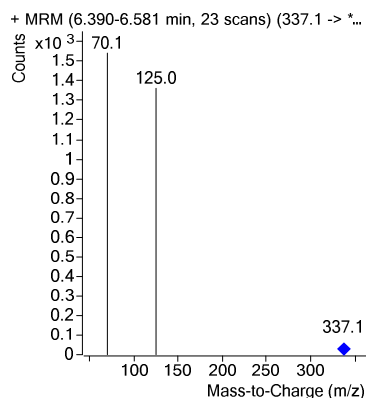

b)

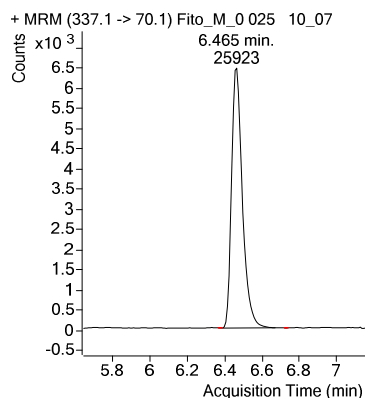

c)

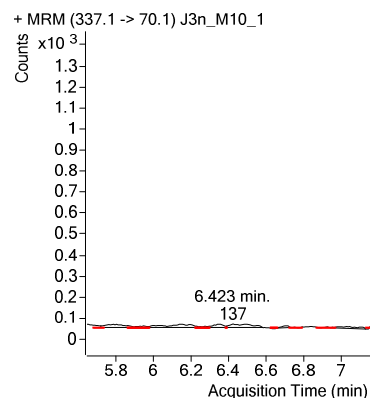

## Difenoconazol

a)

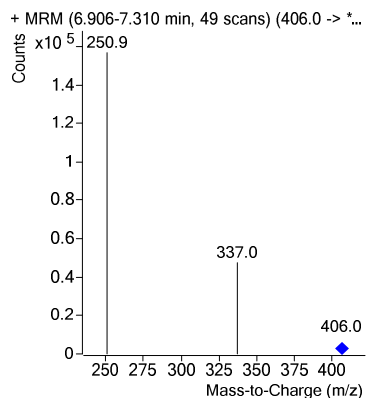

b)

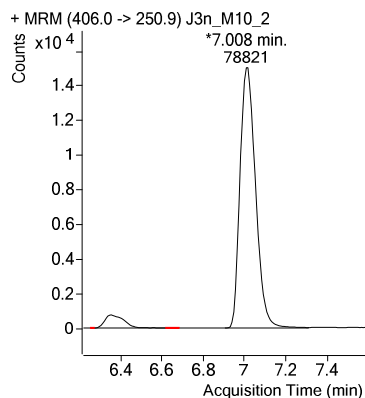

c)

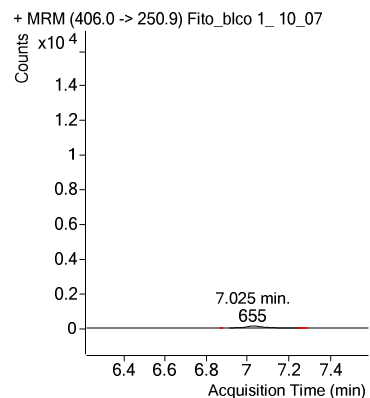

## Dodine

a)

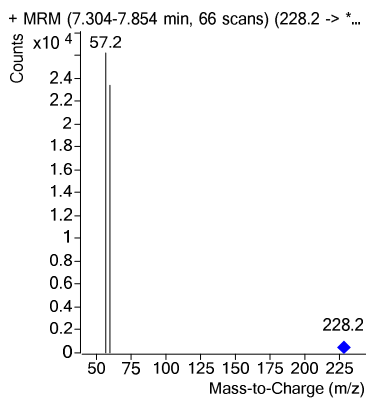

b)

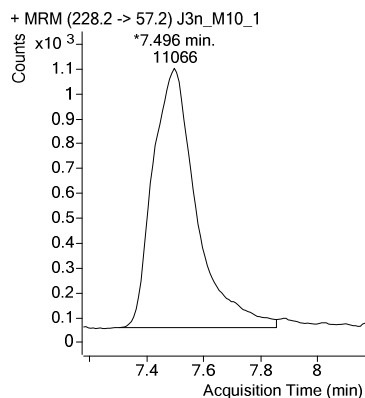

c)

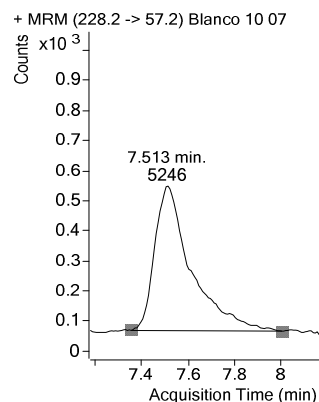

## A- Cyhalothrin

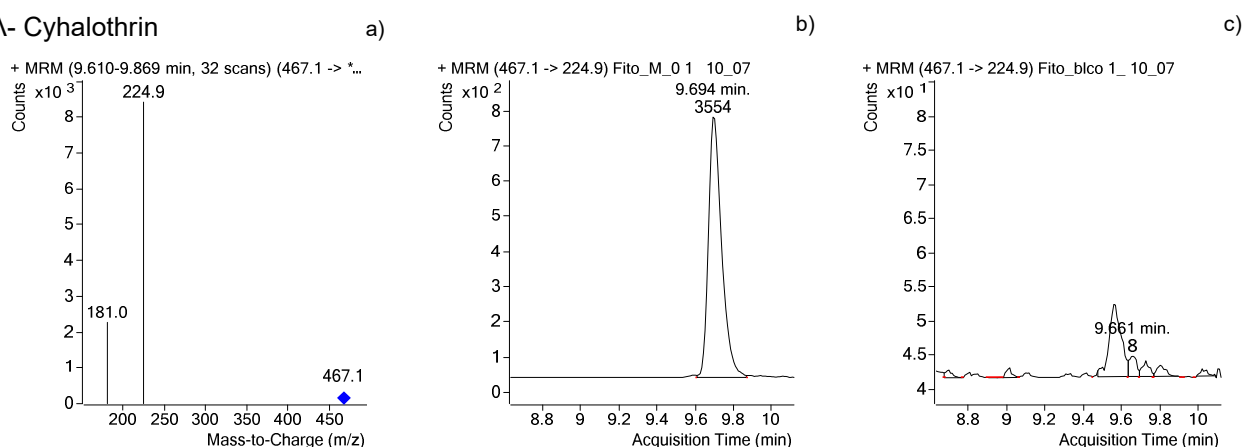

## Delthamethrin

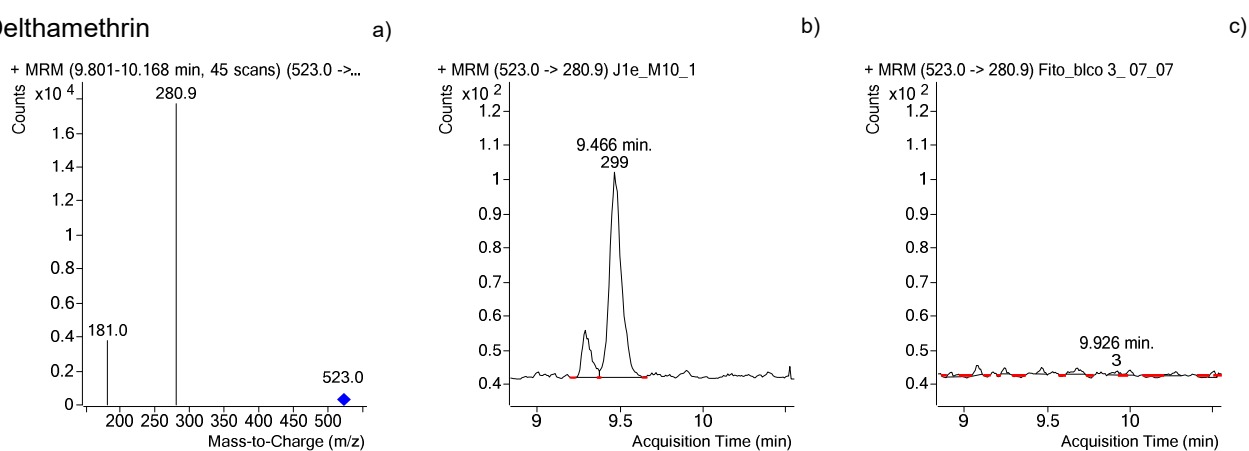

## Sulfoxaflor

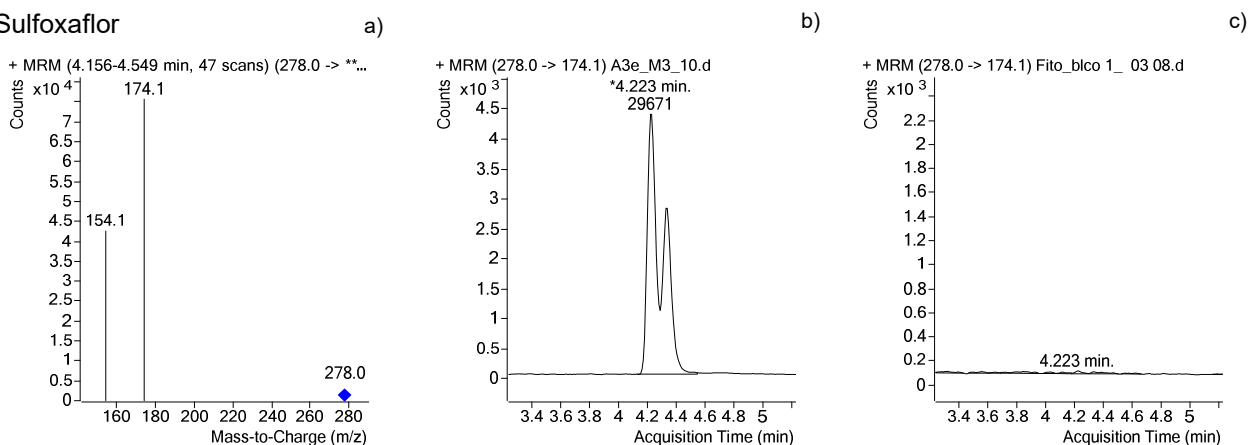

## Spinosad

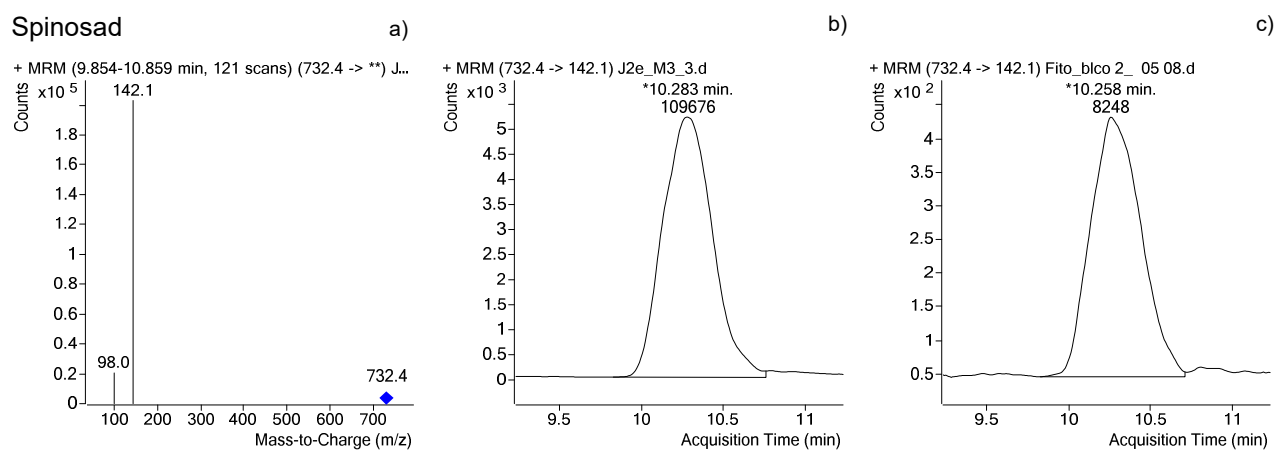

## Spirotetramat

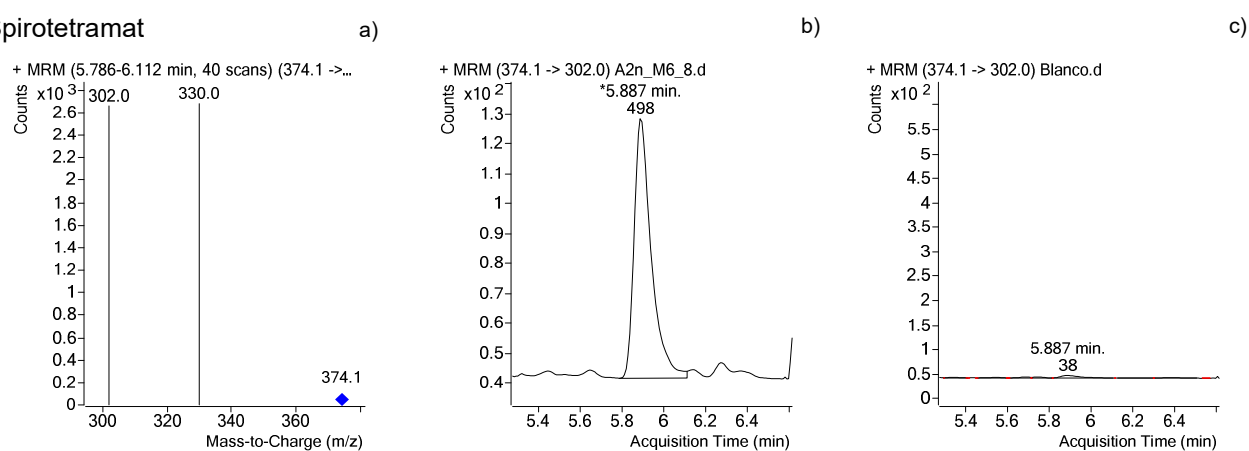

**Figure S7.** Mass Spectra of the studied organic pesticides (a) Chromatograms of the quantification transitions at harvest (b) blank samples
