# Supplementary material
Source: MDPI journal article supplement (https://www.mdpi.com/2073-4395/12/9/1986)
Supplement: s1 [file s1]

**Table S1.** Numbers of arthropods captured in the canopy of the cherry trees in cherry orchards under Standard IPM and New IPM.

| Taxa <sup>1</sup>  | ARAGON       |              | EXTREMADURA  |           |
|--------------------|--------------|--------------|--------------|-----------|
|                    | Standard IPM | Standard IPM | Standard IPM | New IPM   |
| <b>Phytophages</b> | <b>34</b>    | <b>37</b>    | <b>25</b>    | <b>17</b> |
| Acari              | 0            | 0            | 1            | 4         |
| Tetranychidae      | 0            | 0            | 1            | 4         |
| Thysanoptera       | 9            | 9            | 12           | 8         |
| Hemiptera          | 24           | 22           | 12           | 5         |
| Aphididae          | 16           | 17           | 9            | 2         |
| Aphrophoridae      | 1            | 0            | 0            | 0         |
| Cicadellidae       | 6            | 2            | 3            | 3         |
| Coccoidea NI       | 1            | 1            | 0            | 0         |
| Tingidae           | 0            | 2            | 0            | 0         |
| Coleoptera         | 1            | 5            | 0            | 0         |
| Curculionidae      | 1            | 5            | 0            | 0         |
| Lepidoptera        | 0            | 1            | 0            | 0         |
| Geometridae        | 0            | 1            | 0            | 0         |
| <b>Predators</b>   | <b>45</b>    | <b>46</b>    | <b>29</b>    | <b>23</b> |
| Araneae            | 17           | 15           | 2            | 4         |
| Araneidae          | 2            | 1            | 1            | 1         |
| Linyphidae         | 2            | 2            | 0            | 1         |
| Philodromidae      | 1            | 1            | 0            | 0         |
| Pisauridae         | 0            | 1            | 0            | 0         |
| Salticidae         | 0            | 1            | 0            | 2         |
| Tetragnathidae     | 0            | 1            | 0            | 0         |
| Theriididae        | 0            | 1            | 0            | 0         |
| Thomisidae         | 10           | 6            | 0            | 0         |
| Araneae NI         | 2            | 1            | 1            | 0         |
| Acari              | 1            | 1            | 0            | 0         |
| Anystidae          | 1            | 0            | 0            | 0         |
| Bdellidae          | 0            | 1            | 0            | 0         |
| Dermaptera         | 6            | 1            | 8            | 7         |
| Thysanoptera       | 16           | 17           | 14           | 10        |
| Aeolothripidae     | 16           | 17           | 14           | 10        |
| Hemiptera          | 1            | 1            | 0            | 0         |
| Anthocoridae       | 1            | 0            | 0            | 0         |
| Reduviidae         | 0            | 1            | 0            | 0         |
| Diptera            | 2            | 3            | 1            | 0         |
| Dolichopodidae     | 0            | 1            | 0            | 0         |
| Hybotidae          | 2            | 2            | 1            | 0         |
| Neuroptera         | 1            | 2            | 1            | 0         |
| Chrysopidae        | 1            | 1            | 1            | 0         |
| Coniopterygidae    | 0            | 1            | 0            | 0         |
| Coleoptera         | 1            | 6            | 3            | 2         |
| Cantharidae        | 0            | 2            | 0            | 0         |
| Carabidae          | 0            | 1            | 0            | 1         |
| Coccinellidae      | 1            | 2            | 2            | 1         |
| Staphylinidae      | 0            | 1            | 1            | 0         |
| <b>Parasitoids</b> | <b>9</b>     | <b>11</b>    | <b>6</b>     | <b>1</b>  |
| Diptera            | 0            | 0            | 1            | 0         |
| Tachinidae         | 0            | 0            | 1            | 0         |
| Hymenoptera        | 9            | 11           | 5            | 1         |
| Braconidae         | 1            | 1            | 0            | 0         |

|                   |           |           |           |           |
|-------------------|-----------|-----------|-----------|-----------|
| Diapriidae        | 0         | 1         | 0         | 0         |
| Eulophidae        | 1         | 1         | 1         | 0         |
| Figitidae         | 0         | 1         | 0         | 0         |
| Ichneumonidae     | 0         | 1         | 0         | 0         |
| Megaspilidae      | 0         | 0         | 1         | 0         |
| Mymaridae         | 1         | 0         | 1         | 0         |
| Platygastridae    | 1         | 1         | 0         | 0         |
| Pteromalidae      | 2         | 1         | 1         | 0         |
| Scelionidae       | 3         | 2         | 1         | 1         |
| Trichogrammatidae | 0         | 2         | 0         | 0         |
| <b>Others</b>     | <b>80</b> | <b>62</b> | <b>13</b> | <b>13</b> |
| Psocoptera        | 0         | 1         | 1         | 1         |
| Hemiptera         | 0         | 1         | 0         | 2         |
| Lygaeidae         | 0         | 1         | 0         | 0         |
| Pentatomidae      | 0         | 0         | 0         | 2         |
| Diptera           | 23        | 22        | 6         | 4         |
| Bibionidae        | 0         | 2         | 0         | 0         |
| Chironomidae      | 0         | 6         | 0         | 0         |
| Chloropidae       | 1         | 0         | 3         | 3         |
| Ephydriidae       | 0         | 1         | 0         | 0         |
| Heleomyzidae      | 0         | 0         | 1         | 0         |
| Pediidae          | 0         | 1         | 0         | 0         |
| Phoridae          | 15        | 0         | 0         | 0         |
| Scatopsidae       | 1         | 0         | 0         | 0         |
| Sciaridae         | 6         | 12        | 2         | 1         |
| Simuliidae        | 0         | 0         | 1         | 0         |
| Lepidoptera       | 0         | 3         | 0         | 0         |
| Coleoptera        | 13        | 5         | 6         | 5         |
| Bruchidae         | 8         | 2         | 2         | 0         |
| Chrysomelidae     | 2         | 3         | 0         | 1         |
| Cryptophagidae    | 0         | 0         | 1         | 1         |
| Dermestidae       | 3         | 0         | 0         | 0         |
| Nitidulidae       | 0         | 0         | 1         | 1         |
| Coleoptera NI     | 0         | 0         | 2         | 2         |
| Hymenoptera       | 44        | 30        | 0         | 1         |
| Cynipidae         | 0         | 1         | 0         | 1         |
| Formicidae        | 44        | 29        | 0         | 0         |

<sup>1</sup> NI: Not identified specimens
