# Supplementary material
Source: MDPI journal article supplement (https://www.mdpi.com/2073-4395/12/9/1986)
Supplement: s1 [file s1]

**Table S2.** Numbers of ground dwelling arthropods captured in pitfall traps in cherry orchards under Standard IPM and New IPM.

| Taxa <sup>1</sup>  | ARAGON       |             | EXTREMADURA  |            |
|--------------------|--------------|-------------|--------------|------------|
|                    | Standard IPM | New IPM     | Standard IPM | New IPM    |
| <b>Phytophages</b> | <b>89</b>    | <b>123</b>  | <b>362</b>   | <b>347</b> |
| Acari              | 23           | 35          | 40           | 40         |
| Tetranychidae      | 23           | 35          | 40           | 40         |
| Thysanoptera       | 12           | 15          | 12           | 9          |
| Hemiptera          | 54           | 73          | 310          | 298        |
| Aphididae          | 37           | 45          | 290          | 272        |
| Aphrophoridae      | 0            | 0           | 2            | 0          |
| Cicadellidae       | 10           | 15          | 16           | 26         |
| Coccoidea NI       | 7            | 13          | 1            | 0          |
| Diaspididae        | 0            | 0           | 1            | 0          |
| <b>Predators</b>   | <b>1291</b>  | <b>1678</b> | <b>1149</b>  | <b>942</b> |
| Pseudoscorpiones   | 5            | 3           | 1            | 1          |
| Araneae            | 320          | 336         | 305          | 382        |
| Amaurobiidae       | 0            | 1           | 0            | 1          |
| Anyphaenidae       | 3            | 1           | 0            | 1          |
| Araneidae          | 1            | 0           | 0            | 0          |
| Clubionidae        | 0            | 0           | 2            | 0          |
| Corinnidae         | 1            | 0           | 0            | 0          |
| Ctenizidae         | 0            | 0           | 0            | 2          |
| Cybaeidae          | 4            | 0           | 0            | 0          |
| Dictynidae         | 4            | 4           | 5            | 19         |
| Dysderidae         | 8            | 18          | 0            | 2          |
| Gnaphosidae        | 130          | 136         | 71           | 74         |
| Hersiliidae        | 0            | 0           | 0            | 3          |
| Linyphidae         | 30           | 46          | 61           | 47         |
| Lycosidae          | 10           | 18          | 26           | 84         |
| Mimetidae          | 0            | 0           | 1            | 1          |
| Nemesiidae         | 2            | 0           | 21           | 9          |
| Pholcidae          | 1            | 0           | 0            | 0          |
| Pisauridae         | 4            | 4           | 43           | 32         |
| Prodidomidae       | 27           | 32          | 32           | 45         |
| Salticidae         | 2            | 9           | 2            | 11         |
| Scytodidae         | 4            | 1           | 0            | 2          |
| Sicariidae         | 0            | 0           | 0            | 1          |
| Tetragnathidae     | 26           | 10          | 0            | 1          |
| Theriididae        | 0            | 0           | 3            | 1          |
| Thomisidae         | 6            | 5           | 7            | 13         |
| Zodariidae         | 11           | 8           | 0            | 0          |
| Zoridae            | 2            | 0           | 0            | 1          |
| Zorospidae         | 0            | 0           | 0            | 2          |
| Araneae NI         | 44           | 43          | 31           | 30         |
| Opiliones          | 5            | 1           | 75           | 43         |
| Solifugae          | 14           | 24          | 0            | 0          |
| Acari              | 399          | 560         | 160          | 116        |
| Anystidae          | 63           | 137         | 14           | 12         |
| Bdellidae          | 250          | 286         | 43           | 20         |
| Erythraeidae       | 3            | 6           | 25           | 19         |
| Macrochelidae      | 17           | 35          | 42           | 54         |
| Phytoseiidae       | 16           | 82          | 8            | 7          |
| Trombidiidae       | 50           | 14          | 28           | 4          |

|                    |           |           |           |           |
|--------------------|-----------|-----------|-----------|-----------|
| Chilopoda          | 5         | 4         | 26        | 38        |
| Geophilidae        | 1         | 0         | 1         | 4         |
| Lithobiidae        | 4         | 4         | 25        | 34        |
| Dermaptera         | 210       | 219       | 11        | 16        |
| Thysanoptera       | 7         | 6         | 16        | 10        |
| Aeolothripidae     | 7         | 6         | 16        | 10        |
| Hemiptera          | 22        | 55        | 14        | 9         |
| Anthocoridae       | 0         | 1         | 0         | 0         |
| Miridae            | 1         | 1         | 1         | 2         |
| Nabidae            | 19        | 51        | 8         | 4         |
| Reduviidae         | 2         | 2         | 5         | 3         |
| Diptera            | 16        | 30        | 16        | 12        |
| Atelestidae        | 0         | 1         | 0         | 0         |
| Dolichopodidae     | 11        | 14        | 3         | 1         |
| Empididae          | 1         | 0         | 9         | 6         |
| Hybotidae          | 3         | 13        | 3         | 3         |
| Rhagionidae        | 0         | 0         | 0         | 2         |
| Syrphidae          | 0         | 1         | 1         | 0         |
| Therevidae         | 1         | 1         | 0         | 0         |
| Neuroptera         | 2         | 3         | 1         | 1         |
| Chrysopidae        | 2         | 3         | 1         | 0         |
| Myrmeleontidae     | 0         | 0         | 0         | 1         |
| Coleoptera         | 269       | 434       | 520       | 306       |
| Cantharidae        | 0         | 0         | 7         | 0         |
| Carabidae          | 130       | 168       | 221       | 97        |
| Cleridae           | 1         | 0         | 0         | 0         |
| Coccinellidae      | 8         | 7         | 1         | 2         |
| Malachidae         | 0         | 0         | 1         | 1         |
| Staphylinidae      | 117       | 223       | 290       | 206       |
| Coleoptera NI      | 13        | 36        | 0         | 0         |
| Hymenoptera        | 17        | 3         | 4         | 8         |
| Crabronidae        | 2         | 0         | 0         | 0         |
| Mutillidae         | 0         | 0         | 0         | 2         |
| Pompilidae         | 7         | 1         | 3         | 2         |
| Sphecidae          | 7         | 2         | 1         | 3         |
| Tiphidae           | 1         | 0         | 0         | 0         |
| Vespidae           | 0         | 0         | 0         | 1         |
| <b>Parasitoids</b> | <b>64</b> | <b>94</b> | <b>60</b> | <b>53</b> |
| Diptera            | 10        | 8         | 2         | 0         |
| Rhinophoridae      | 7         | 5         | 0         | 0         |
| Tachinidae         | 3         | 3         | 2         | 0         |
| Hymenoptera        | 54        | 86        | 58        | 53        |
| Aphelinidae        | 1         | 0         | 0         | 0         |
| Bethyidae          | 5         | 4         | 0         | 2         |
| Braconidae         | 4         | 3         | 1         | 2         |
| Ceraphronidae      | 3         | 2         | 3         | 3         |
| Diapriidae         | 16        | 27        | 13        | 17        |
| Encyrtidae         | 4         | 1         | 0         | 2         |
| Eulophidae         | 0         | 0         | 1         | 0         |
| Figitidae          | 0         | 2         | 0         | 1         |
| Ichneumonidae      | 2         | 0         | 2         | 3         |
| Megaspilidae       | 0         | 6         | 3         | 1         |
| Mymaridae          | 3         | 4         | 1         | 1         |
| Platygastridae     | 3         | 1         | 1         | 1         |
| Proctotrupidae     | 0         | 1         | 2         | 0         |
| Pteromalidae       | 1         | 1         | 1         | 1         |
| Scelionidae        | 12        | 34        | 30        | 19        |

| <b>Others</b>   | <b>1162</b> | <b>1279</b> | <b>626</b> | <b>566</b> |
|-----------------|-------------|-------------|------------|------------|
| Acari           | 134         | 69          | 138        | 129        |
| Oribatida       | 118         | 47          | 92         | 108        |
| Acari NI        | 16          | 22          | 46         | 21         |
| Isopoda         | 132         | 446         | 2          | 4          |
| Diplopoda       | 4           | 6           | 30         | 20         |
| Zygentoma       | 29          | 12          | 0          | 2          |
| Ephemeroptera   | 0           | 0           | 1          | 1          |
| Dictyoptera     | 0           | 1           | 0          | 0          |
| Blattidae       | 0           | 1           | 0          | 0          |
| Isoptera        | 0           | 3           | 0          | 2          |
| Orthoptera      | 3           | 2           | 0          | 9          |
| Acrididae       | 3           | 2           | 0          | 0          |
| Gryllidae       | 0           | 0           | 0          | 9          |
| Embioptera      | 41          | 29          | 1          | 6          |
| Psocoptera      | 24          | 65          | 0          | 0          |
| Hemiptera       | 77          | 25          | 19         | 11         |
| Caliscelidae    | 0           | 0           | 0          | 1          |
| Cercopidae      | 1           | 3           | 2          | 0          |
| Cixidae         | 0           | 0           | 1          | 0          |
| Cydnidae        | 1           | 2           | 6          | 2          |
| Delphacidae     | 1           | 0           | 1          | 0          |
| Dictyopharidae  | 2           | 0           | 0          | 1          |
| Issidae         | 0           | 0           | 1          | 1          |
| Lygaeidae       | 3           | 2           | 2          | 1          |
| Psyllidae       | 0           | 1           | 0          | 0          |
| Pyrrhocoridae   | 48          | 9           | 6          | 0          |
| Rhopalidae      | 1           | 0           | 0          | 0          |
| Hemiptera NI    | 20          | 8           | 0          | 4          |
| Diptera         | 585         | 467         | 303        | 229        |
| Anthomyidae     | 133         | 92          | 46         | 24         |
| Bibionidae      | 1           | 1           | 3          | 1          |
| Calliphoridae   | 65          | 73          | 4          | 3          |
| Carnidae        | 1           | 0           | 0          | 0          |
| Cecidomyiidae   | 17          | 24          | 10         | 11         |
| Ceratopogonidae | 2           | 1           | 1          | 0          |
| Chironomidae    | 5           | 4           | 6          | 3          |
| Chloropidae     | 22          | 7           | 0          | 1          |
| Drosophilidae   | 1           | 1           | 1          | 2          |
| Ephydriidae     | 2           | 7           | 0          | 2          |
| Lauxaniidae     | 2           | 2           | 0          | 0          |
| Lonchopteridae  | 0           | 0           | 2          | 1          |
| Muscidae        | 3           | 2           | 2          | 0          |
| Mycetophilidae  | 2           | 2           | 4          | 7          |
| Opomyzidae      | 0           | 0           | 0          | 1          |
| Phoridae        | 155         | 118         | 50         | 26         |
| Psychodidae     | 0           | 3           | 0          | 1          |
| Scathophagidae  | 0           | 1           | 1          | 0          |
| Scatopsidae     | 2           | 1           | 0          | 3          |
| Sciaridae       | 103         | 92          | 141        | 125        |
| Sphaeroceridae  | 0           | 4           | 2          | 5          |
| Tipulidae       | 6           | 1           | 26         | 11         |
| Diptera NI      | 63          | 31          | 4          | 2          |
| Lepidoptera     | 4           | 5           | 2          | 5          |
| Coleoptera      | 106         | 126         | 97         | 131        |
| Anthicidae      | 16          | 34          | 5          | 7          |
| Bruchidae       | 2           | 2           | 2          | 1          |

|                |    |    |    |    |
|----------------|----|----|----|----|
| Buprestidae    | 0  | 0  | 0  | 1  |
| Chrysomelidae  | 8  | 8  | 1  | 1  |
| Corylophidae   | 13 | 12 | 0  | 1  |
| Cryptophagidae | 1  | 2  | 0  | 0  |
| Cucujidae      | 0  | 1  | 0  | 0  |
| Curculionidae  | 7  | 10 | 4  | 8  |
| Dermestidae    | 1  | 2  | 1  | 3  |
| Elateridae     | 11 | 9  | 3  | 2  |
| Histeridae     | 3  | 1  | 7  | 2  |
| Latridiidae    | 3  | 7  | 6  | 1  |
| Melandryidae   | 3  | 3  | 6  | 13 |
| Meloidae       | 0  | 0  | 0  | 3  |
| Nitidulidae    | 3  | 8  | 1  | 13 |
| Phalacridae    | 1  | 0  | 0  | 0  |
| Ptiliidae      | 0  | 0  | 1  | 0  |
| Scarabeidae    | 0  | 4  | 0  | 2  |
| Scolytidae     | 1  | 0  | 0  | 0  |
| Silphidae      | 1  | 3  | 0  | 0  |
| Tenebrionidae  | 32 | 16 | 6  | 35 |
| Coleoptera NI  | 0  | 4  | 54 | 38 |
| Hymenoptera    | 16 | 15 | 9  | 17 |
| Apidae         | 9  | 13 | 9  | 17 |
| Chrysididae    | 4  | 1  | 0  | 0  |
| Cynipidae      | 3  | 0  | 0  | 0  |
| Tenthredinidae | 0  | 1  | 0  | 0  |
| NI             | 7  | 8  | 24 | 0  |

<sup>1</sup> NI: Not identified specimens
